# Supplementary material
Source: Springer Nature journal article supplement (https://www.springermedizin.de/resource/supplementary/13058_2013_3369_MOESM10_ESM.pdf/9703970)

**A**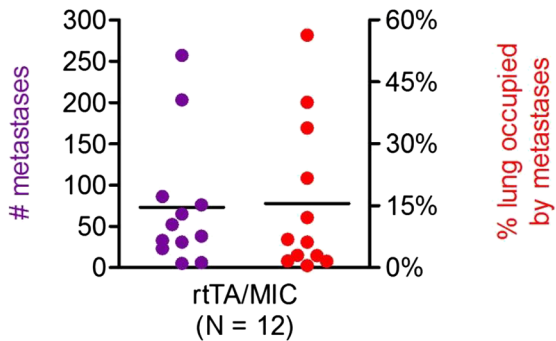**B**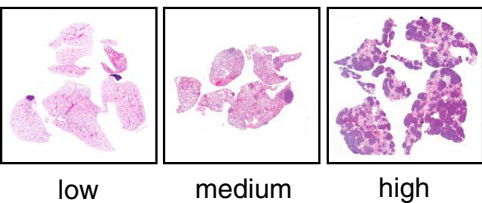

low

medium

high

**C**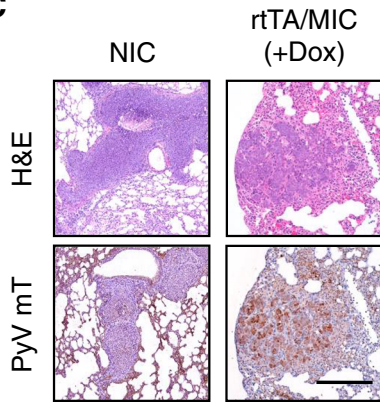

NIC

rtTA/MIC  
(+Dox)

H&amp;E

PyV mT

Supplement: MOESM10 [file 9703970]
